# Supplementary material for: CpG preconditioning reduces accumulation of lysophosphatidylcholine in ischemic brain tissue after middle cerebral artery occlusion
Source: PubMed Central journal article supplement (PMC8007524; doi:10.1007/s00216-020-02987-w), 2020-10-19
Supplement: 216_2020_2987_MOESM1_ESM.pdf [file 216_2020_2987_MOESM1_ESM.pdf]

**Analytical and Bioanalytical Chemistry**

**Electronic Supplementary Material**

**CpG preconditioning reduces accumulation of lysophosphatidylcholine  
in ischemic brain tissue after middle cerebral artery occlusion**

Leonidas Mavroudakis, Susan L. Stevens, Kyle D. Duncan, Mary P. Stenzel-Poore, Julia Laskin,  
Ingela Lanekoff

## **Table of contents**

**Fig S1** MS/MS spectra of detected endogenous phospholipids.

**Fig S2** Ion image comparison using different internal standard for normalization of endogenous LPC 18:1.

**Fig S3** ROI concentration comparison using two different internal standards for normalization of endogenous LPC species.

**Fig S4** Normalization of endogenous PC 34:1 using two different internal standards.

**Fig S5** Ion image and line scan data showing dynamics of LPC accumulation.

**Fig S6** PC alterations in MCAO treated mice.

**Table S1** Annotated lipid species along with their observed and theoretical  $m/z$  and mass error in parts per million (ppm).

**Table S2** Potential isobaric interferences on reported PC species as sodium adducts and mass resolving power required for peak separation.

**Table S3** Number of pixels selected for each ROI.

**Table S4** Average detected concentration ( $\mu\text{M}/\text{pixel}$ ), standard deviation and fold change of LPC species in ischemic mouse brain preconditioned with saline or CpG.

**Table S5** Average detected concentration ( $\mu\text{M}/\text{pixel}$ ) and standard deviation of PC species in ischemic mouse brain preconditioned with saline or CpG

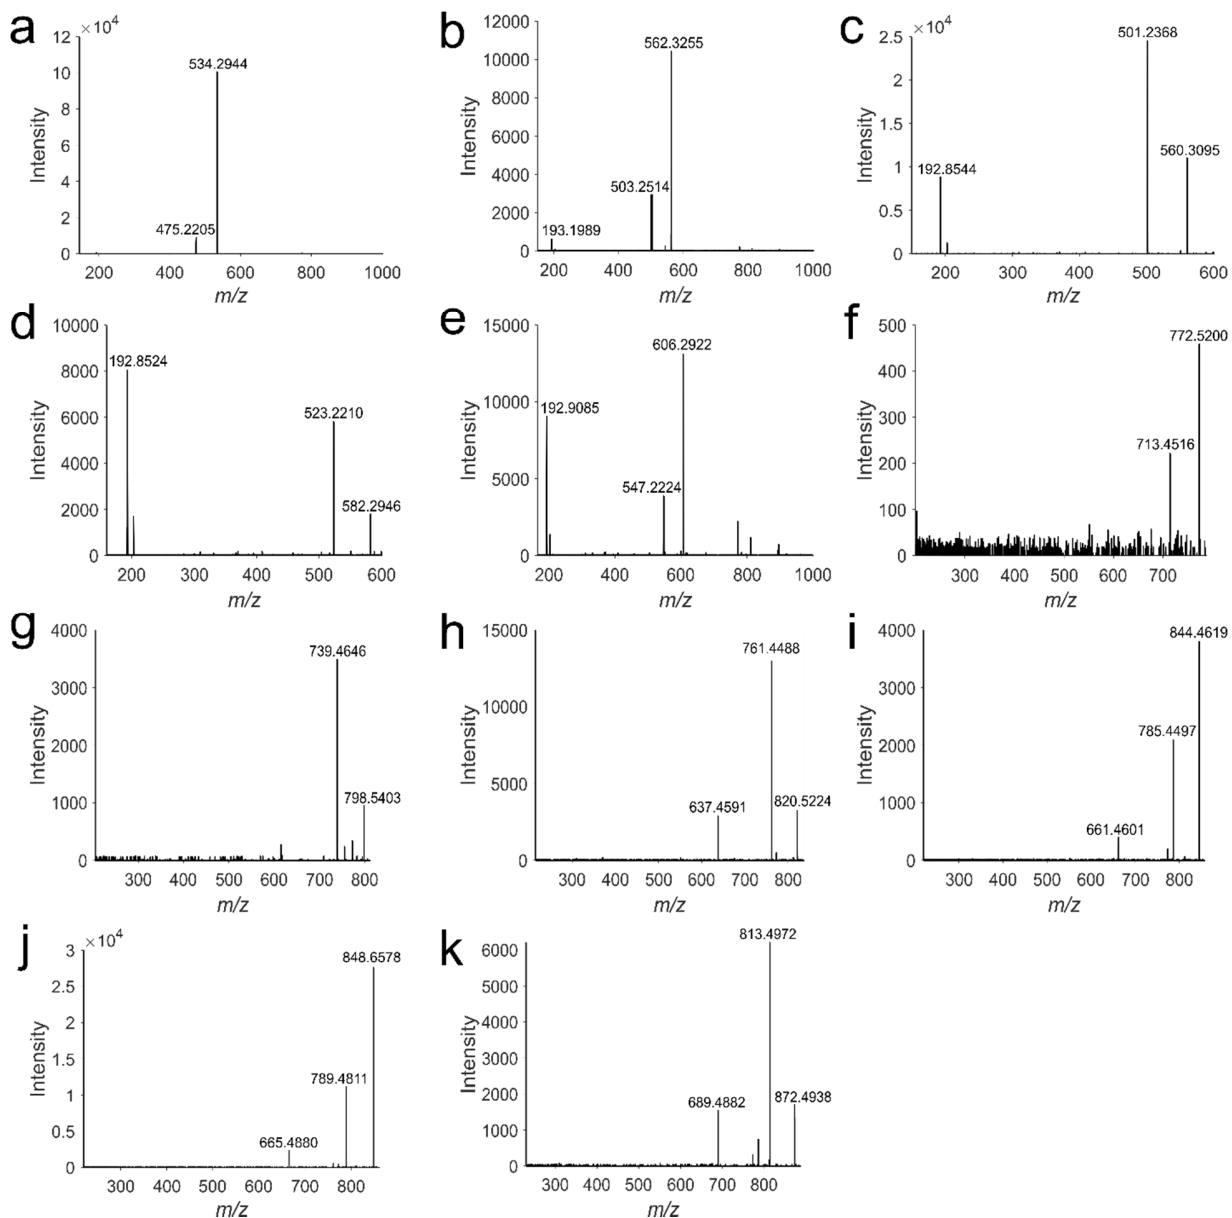

**Fig. S1** MS/MS spectra of detected potassium adducts of endogenous phospholipids a) LPC 16:0 b) LPC 18:0 c) LPC 18:1 d) LPC 20:4 e) LPC 22:6 f) PC 32:0 g) PC 34:1 h) PC 36:4 i) PC 38:6 j) PC 38:4 k) PC 40:6. The loss of  $N(CH_3)_3$  (59 mass units) is visible in all cases

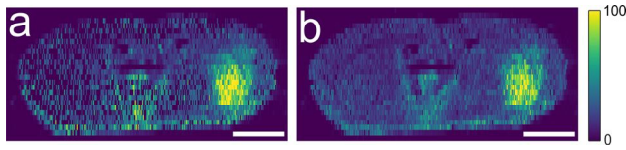

**Fig. S2** Ion image comparison using different internal standard for normalization of endogenous LPC 18:1 a) Ion image of  $[\text{LPC } 18:1 + \text{Na}]^+$  normalized to  $[\text{LPC } 13:0 + \text{Na}]^+$ . b) Ion image of  $[\text{LPC } 18:1 + \text{K}]^+$  normalized to  $[\text{LPC } 13:0 + \text{K}]^+$ . Scale bar shows 2 mm. Colorbar scale ranges from 0 to 100 % signal intensity. For the optical image see Fig 1 of main text

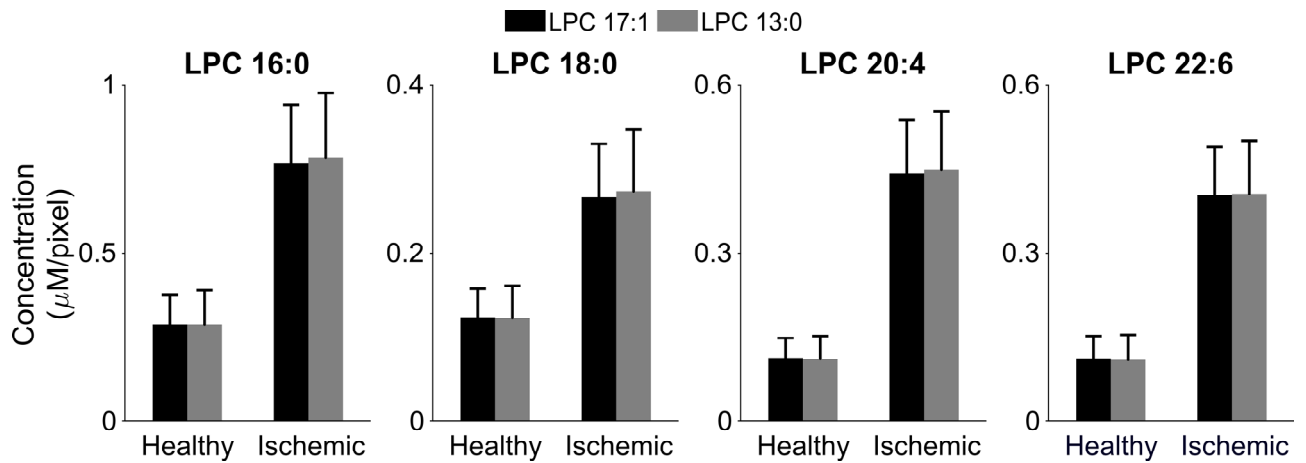

**Fig. S3** ROI concentration comparison using two different internal standards for normalization of endogenous LPC species. Average concentrations of four endogenous LPC species in the healthy and ischemic part of mouse brain using LPC 17:1 (black bars) and LPC 13:0 (grey bars) as internal standard for quantitation. Potassium adducts were used for both endogenous and internal standard lipids

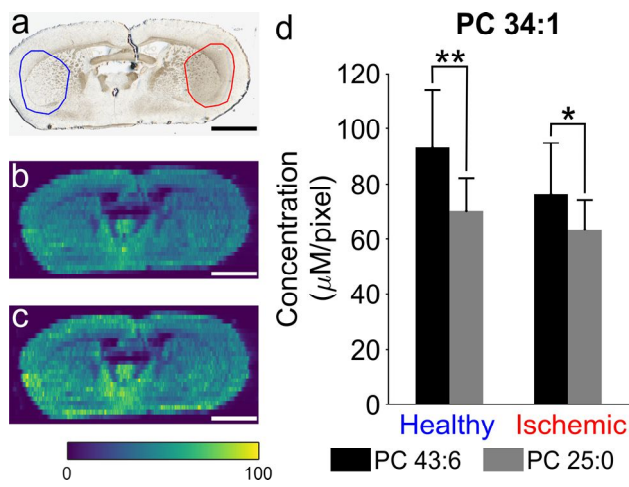

**Fig. S4** Normalization of endogenous PC 34:1 using two different internal standards. a) Optical image of ischemic mouse brain tissue where the healthy and ischemic area are indicated by blue and red circle, respectively. b) Ion image of  $[\text{PC } 34:1 + \text{K}]^+$  normalized to  $[\text{PC } 43:6 + \text{K}]^+$ . c) Ion image of  $[\text{PC } 34:1 + \text{K}]^+$  normalized to  $[\text{PC } 25:0 + \text{K}]^+$ . d) Average concentrations of PC 34:1 extracted from ROI analysis in the healthy and ischemic part of the tissue section using PC 43:6 (black bars) and PC 25:0 (grey bars) as internal standards for quantitation. One tail t-test was performed to determine whether the means were statistically significant,  $*p < 0.05$  and  $**p < 0.01$ . Color bar scale ranges from 0 to 100 % signal intensity. Scale bars show 2 mm

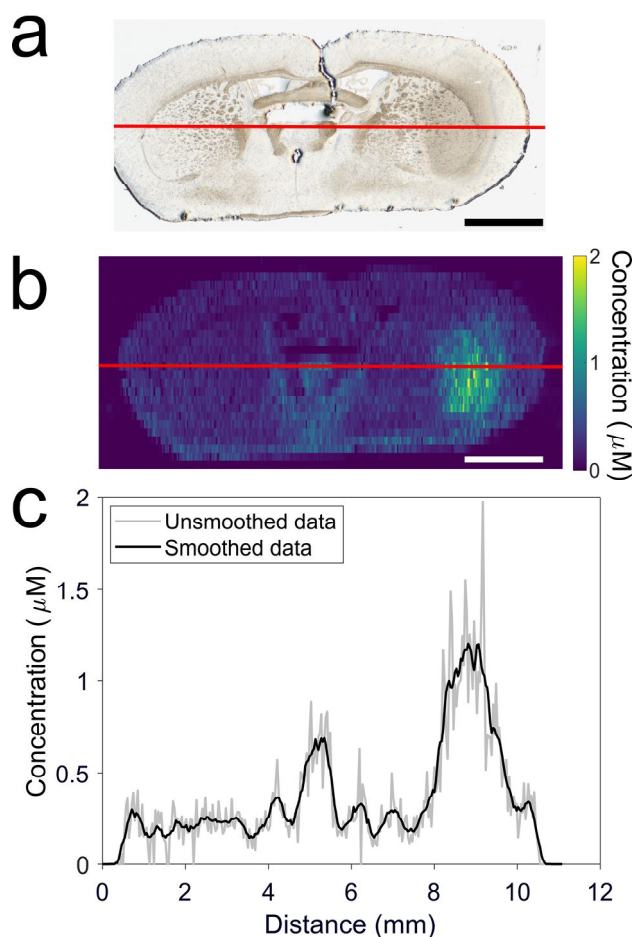

**Fig. S5** Ion image and line scan data showing dynamics of LPC accumulation a) Optical image of ischemic mouse brain tissue section. b) Ion image of  $[LPC\ 18:1 + K]^+$  normalized to standard  $[LPC\ 17:1 + K]^+$ . Normalized signal was converted to concentration (see main text). c) Line scan trace showing the detected concentration of LPC 18:1 when scanning from left to right of the tissue section. Red line in a and b show the line scan that is depicted in c. In c, both raw (grey line) and smoothed (black line) data are shown. Smoothing was done using rolling average of 9 data points. Scale bars show 2 mm

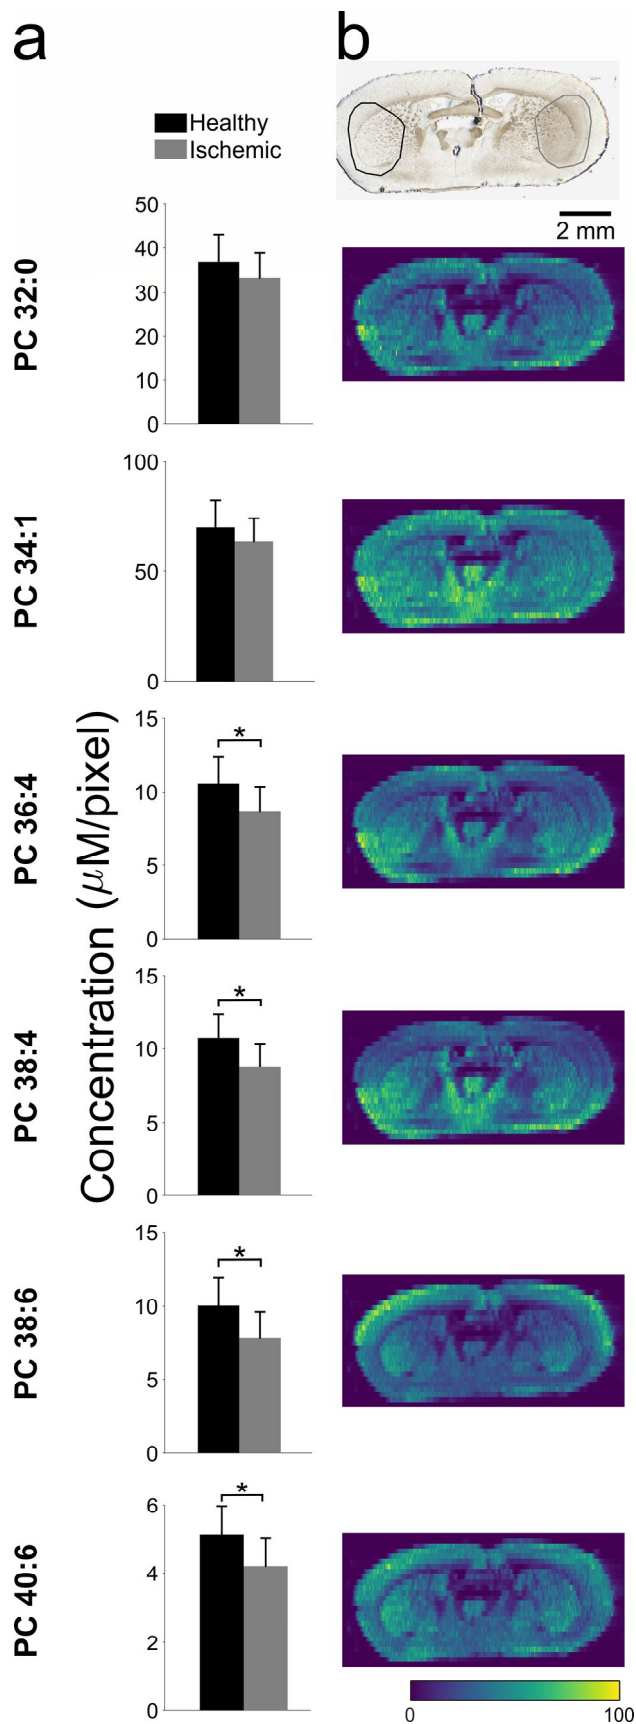

**Fig. S6** PC alterations in MCAO treated mice. a) Average concentrations of selected PC species detected in healthy and ischemic part of mouse brain. One tail t-test was performed on the group means to determine statistically significant differences,  $*p < 0.02$ . Data were normalized to the internal standard PC 25:0 and potassium adducts were used for both endogenous lipids and the internal standard. b) Optical images of ischemic mouse brain where the healthy and ischemic parts are indicated by black and grey circles, respectively. Internal standard normalized (PC 25:0) ion images of PC species detected in ischemic mouse brain. Color bar scale ranges from 0 to 100 % signal intensity

**Table S1** Annotated lipid species along with their observed and theoretical  $m/z$  and mass error in parts per million (ppm)

| Annotated species                         | Experimental $m/z$ | Theoretical $m/z$ | Mass error (ppm) |
|-------------------------------------------|--------------------|-------------------|------------------|
| [LPC 13:0 + Na] <sup>+</sup> <sup>a</sup> | 476.2746           | 476.2748          | -0.42            |
| [LPC 13:0 + K] <sup>+</sup> <sup>a</sup>  | 492.2486           | 492.2487          | -0.20            |
| [LPC 17:1 + Na] <sup>+</sup> <sup>a</sup> | 530.3217           | 530.3217          | 0.00             |
| [LPC 17:1 + K] <sup>+</sup> <sup>a</sup>  | 546.2956           | 546.2956          | 0.00             |
| [LPC 16:0 + K] <sup>+</sup>               | 534.2955           | 534.2956          | -0.19            |
| [LPC 18:0 + K] <sup>+</sup>               | 562.3268           | 562.3269          | -0.18            |
| [LPC 18:1 + K] <sup>+</sup>               | 560.3113           | 560.3113          | 0.00             |
| [LPC 20:4 + K] <sup>+</sup>               | 582.2957           | 582.2956          | 0.17             |
| [LPC 22:6 + K] <sup>+</sup>               | 606.2956           | 606.2956          | 0.00             |
| [PC 25:0 + Na] <sup>+</sup> <sup>a</sup>  | 658.4420           | 658.4418          | 0.30             |
| [PC 25:0 + K] <sup>+</sup> <sup>a</sup>   | 674.4159           | 674.4158          | 0.15             |
| [PC 43:6 + Na] <sup>+</sup> <sup>a</sup>  | 898.6302           | 898.6296          | 0.67             |
| [PC 43:6 + K] <sup>+</sup> <sup>a</sup>   | 914.6041           | 914.6036          | 0.55             |
| [PC 32:0 + K] <sup>+</sup>                | 772.5256           | 772.5253          | 0.39             |
| [PC 34:1 + K] <sup>+</sup>                | 798.5412           | 798.5410          | 0.25             |
| [PC 36:4 + K] <sup>+</sup>                | 820.5257           | 820.5253          | 0.49             |
| [PC 38:4 + K] <sup>+</sup>                | 848.5571           | 848.5566          | 0.59             |
| [PC 38:6 + K] <sup>+</sup>                | 844.5257           | 844.5253          | 0.47             |
| [PC 40:6 + K] <sup>+</sup>                | 872.5572           | 872.5566          | 0.69             |

<sup>a</sup>Standards included in the nano-DESI solvent

**Table S2** Potential isobaric interferences on reported PC species as sodium adducts and mass resolving power required for peak separation

| Lipid                       | Exact mass (amu) | Potential isobaric interference         | Exact mass (amu) | Required resolving power |
|-----------------------------|------------------|-----------------------------------------|------------------|--------------------------|
| [PC 32:0 + Na] <sup>+</sup> | 756.5514         | [PC 34:3 + H] <sup>+</sup> <sup>a</sup> | 756.5538         | 315 000                  |
| [PC 34:1 + Na] <sup>+</sup> | 782.5670         | [PC 36:4 + H] <sup>+</sup> <sup>b</sup> | 782.5694         | 325 000                  |
| [PC 36:4 + Na] <sup>+</sup> | 804.5514         | [PC 38:7 + H] <sup>+</sup> <sup>c</sup> | 804.5538         | 335 000                  |
| [PC 38:4 + Na] <sup>+</sup> | 832.5827         | [PC 40:7 + H] <sup>+</sup> <sup>b</sup> | 832.5851         | 345 000                  |
| [PC 38:6 + Na] <sup>+</sup> | 828.5514         | [PC 40:9 + H] <sup>+</sup> <sup>d</sup> | 828.5538         | 345 000                  |
| [PC 40:6 + Na] <sup>+</sup> | 856.5827         | [PC 42:9 + H] <sup>+</sup> <sup>a</sup> | 856.5851         | 355 000                  |

<sup>a</sup>Corresponding sodium and potassium adducts detected with low intensity

<sup>b</sup>Corresponding sodium and potassium adducts detected with high intensity

<sup>c</sup>Potassiated adduct detected with low intensity

<sup>d</sup>No sodiated and potassiated adducts detected



**Table S3** Number of pixels selected for each ROI. Nine replicates (three mice and three sections from each mice) were used for saline preconditioning while six replicates (two mice and three sections from each mice) were used for CpG preconditioning

|                          | Saline       |               | CpG          |               |
|--------------------------|--------------|---------------|--------------|---------------|
|                          | Healthy half | Ischemic half | Healthy half | Ischemic half |
| Number of pixels for ROI | 8858         | 8807          | 1900         | 1902          |
|                          | 9496         | 9464          | 1996         | 1973          |
|                          | 8879         | 8880          | 2928         | 2910          |
|                          | 6610         | 6609          | 2840         | 2839          |
|                          | 6558         | 6584          | 4081         | 4068          |
|                          | 5693         | 5720          | 3722         | 3718          |
|                          | 4291         | 4278          |              |               |
|                          | 3416         | 3387          |              |               |
|                          | 4555         | 4553          |              |               |
| <b>Average</b>           | 6484         | 6476          | 2911         | 2902          |
| <b>SD<sup>a</sup></b>    | 2209         | 2203          | 882          | 882           |

<sup>a</sup>Standard deviation

**Table S4** Average detected concentration ( $\mu\text{M}/\text{pixel}$ ), standard deviation and fold change of LPC species in ischemic mouse brain preconditioned with saline or CpG

|        |                          | LPC 16:0        | LPC 18:0        | LPC 18:1        | LPC 20:4        | LPC 22:6        |
|--------|--------------------------|-----------------|-----------------|-----------------|-----------------|-----------------|
| Saline | Healthy half             | 0.29 $\pm$ 0.09 | 0.12 $\pm$ 0.03 | 0.18 $\pm$ 0.05 | 0.11 $\pm$ 0.03 | 0.11 $\pm$ 0.04 |
|        | Ischemic half            | 0.77 $\pm$ 0.17 | 0.27 $\pm$ 0.06 | 0.63 $\pm$ 0.14 | 0.44 $\pm$ 0.10 | 0.40 $\pm$ 0.09 |
|        | Fold change <sup>a</sup> | 2.66 $\pm$ 1.01 | 2.15 $\pm$ 0.78 | 3.51 $\pm$ 1.32 | 3.89 $\pm$ 1.45 | 3.58 $\pm$ 1.46 |
| CpG    | Healthy half             | 0.31 $\pm$ 0.07 | 0.16 $\pm$ 0.03 | 0.19 $\pm$ 0.04 | 0.09 $\pm$ 0.03 | 0.10 $\pm$ 0.04 |
|        | Ischemic half            | 0.52 $\pm$ 0.15 | 0.22 $\pm$ 0.05 | 0.36 $\pm$ 0.10 | 0.18 $\pm$ 0.05 | 0.20 $\pm$ 0.05 |
|        | Fold change <sup>a</sup> | 1.68 $\pm$ 0.61 | 1.34 $\pm$ 0.44 | 1.95 $\pm$ 0.69 | 2.14 $\pm$ 0.97 | 2.06 $\pm$ 0.97 |

<sup>a</sup>Ratio of ischemic over healthy half, standard deviations are calculated using error propagation

**Table S5** Average detected concentration ( $\mu\text{M}/\text{pixel}$ ) and standard deviation of PC species in ischemic mouse brain preconditioned with saline or CpG

|        |               | PC 32:0           | PC 34:1            | PC 36:4          | PC 38:4          |
|--------|---------------|-------------------|--------------------|------------------|------------------|
| Saline | Healthy half  | 48.29 $\pm$ 9.67  | 93.11 $\pm$ 20.80  | 14.30 $\pm$ 3.39 | 14.27 $\pm$ 2.91 |
|        | Ischemic half | 39.67 $\pm$ 9.51  | 76.24 $\pm$ 18.49  | 10.60 $\pm$ 3.00 | 10.61 $\pm$ 2.80 |
| CpG    | Healthy half  | 56.31 $\pm$ 17.81 | 116.80 $\pm$ 22.99 | 16.70 $\pm$ 3.26 | 15.41 $\pm$ 2.89 |
|        | Ischemic half | 54.98 $\pm$ 15.04 | 107.30 $\pm$ 24.06 | 15.82 $\pm$ 4.27 | 14.74 $\pm$ 3.58 |

**Table S5** (continued)

|        |               | PC 38:6          | PC 40:6         |
|--------|---------------|------------------|-----------------|
| Saline | Healthy half  | 13.60 $\pm$ 3.46 | 6.82 $\pm$ 1.42 |
|        | Ischemic half | 9.56 $\pm$ 2.91  | 5.07 $\pm$ 1.34 |
| CpG    | Healthy half  | 16.99 $\pm$ 4.88 | 7.78 $\pm$ 2.55 |
|        | Ischemic half | 16.07 $\pm$ 3.48 | 7.99 $\pm$ 1.69 |
